# Supplementary material
Source: PubMed Central journal article supplement (PMC8110949)
Supplement: NIHMS1670079-supplement-1.pdf [file NIHMS1670079-supplement-1.pdf]

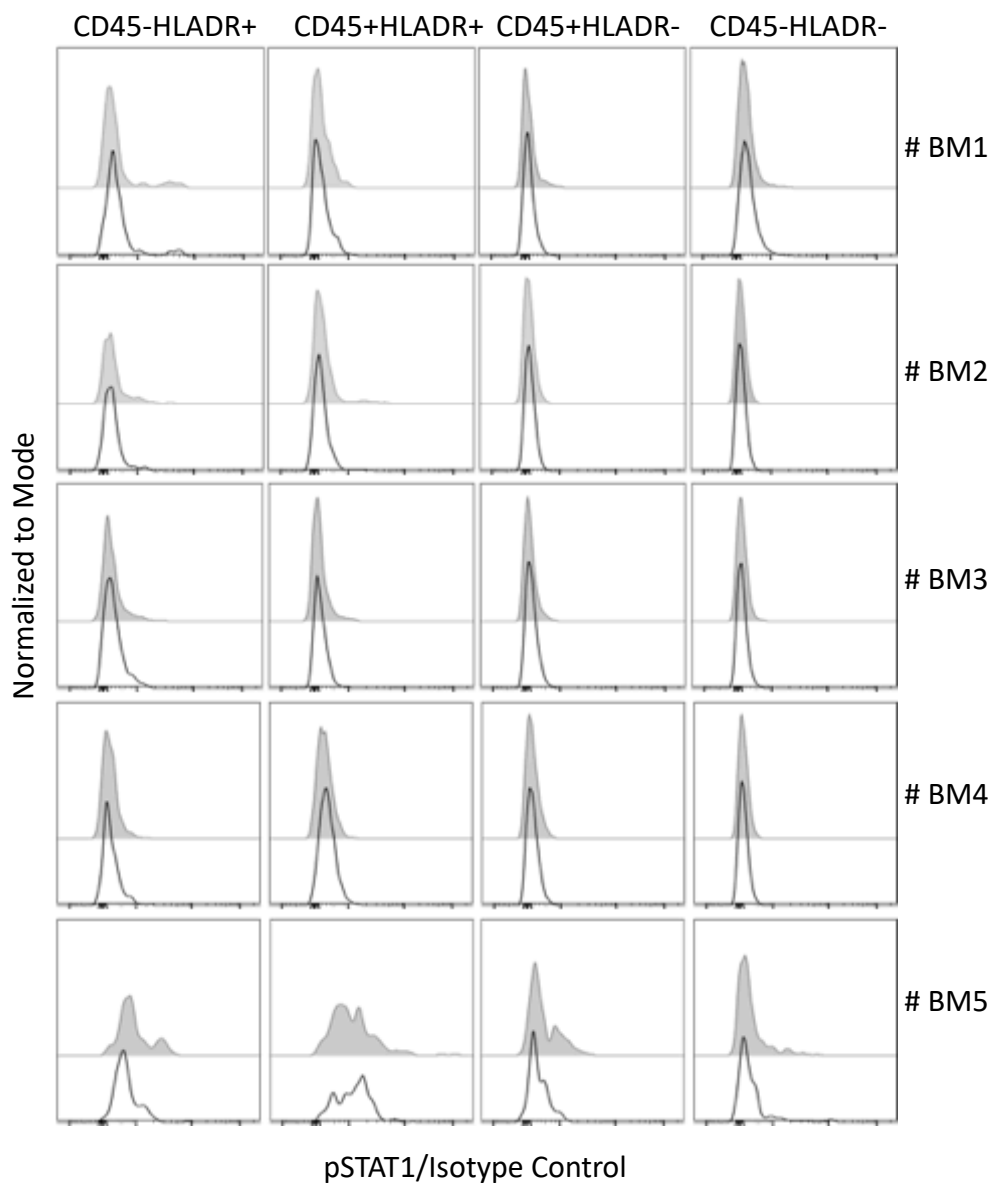

**Figure S1. Analysis of basal pSTAT-1 expression on bone marrow aspirates.**

Primary bone marrow mononuclear cells (MNCs) were stained for pSTAT-1 or appropriate isotype control antibody along with phosflow compatible HLADR and CD45 antibodies and were analyzed in flow cytometer. Grey and white histograms represent isotype control and pSTAT-1 respectively.
